# Supplementary material for: Field-effect transistor array modified by a stationary phase to generate informative signal patterns for machine learning-assisted recognition of gas-phase chemicals
Source: Royal Society of Chemistry journal article supplement (doi:10.1039/c8me00097b), 2019-01-01
Supplement: c8me00097b1.pdf [file c8me00097b1.pdf]

Electronic Supplementary Information for *Molecular System Design & Engineering*

## Field-effect transistor array modified by a stationary phase to generate informative signal patterns for machine learning-assisted recognition of gas-phase chemicals

Toshihiro Yoshizumi,<sup>a</sup> Tatsuro Goda,<sup>a</sup> Rui Yatabe,<sup>b</sup> Akio Oki,<sup>c</sup> Akira Matsumoto,<sup>a,d</sup> Hiroaki Oka,<sup>c</sup> Takashi Washio,<sup>c</sup> Kiyoshi Toko,<sup>b</sup> and Yuji Miyahara<sup>\*a</sup>

<sup>a</sup> *Institute of Biomaterials and Bioengineering, Tokyo Medical and Dental University, 2-3-10 Kanda-Surugadai, Chiyoda ku, Tokyo, 101-0062, Japan.*

<sup>b</sup> *Research and Development Center for Taste and Odor Sensing, Kyushu University, 744 Motoooka, Nishi ku, Fukuoka, 819-0395, Japan.*

<sup>c</sup> *Sensing Solutions Development Center, Panasonic Automotive and Industrial Systems Company, 1006 Kadoma, Kadoma, Osaka, 571-8506, Japan.*

<sup>d</sup> *Kanagawa Institute of Industrial Science and Technology, 3-2-1 Sakado, Takatsu-ku, Kawasaki, 213-0012, Japan.*

<sup>e</sup> *The Institute of Scientific and Industrial Research, Osaka University, 8-1 Mihogaoka, Osaka, 567-0047, Japan.*

\*Corresponding author E-mail address; miyahara.bsr@tmd.ac.jp

### Contents

1. Experimental details
  - 1.1. Fabrication of gas chromatograph (GC) stationary phase-modified porous gate field-effect transistor (PGFET) samples
  - 1.2. Real-time volatile organic compound (VOC) sensing by stationary phase-modified PGFETs
  - 1.3. Electron microscope observations of the PGFET sample
  - 1.4. Classification of signal patterns derived from PGFET sensors by a machine-learning technique for recognition of VOCs
2. Supplemental figures
  - 2.1. Fig. S1
  - 2.2. Fig. S2
  - 2.3. Fig. S3
  - 2.4. Fig. S4
  - 2.5. Fig. S5

## 1. Experimental details.

### 1.1. Fabrication of gas chromatograph (GC) stationary phase-modified porous gate field-effect transistor (PGFET) samples

To fabricate the GC stationary phase material-modified PGFETs, we used an *n*-channel depletion mode FET-based sample (ISFET com., Japan), with no gate electrode. GC stationary phase materials, such as dimethyl poly siloxane (silicone OV-1; Shinwa Chemical Industries, Japan), polyethylene glycol (PEG; PEG4000, USP, USA), diethylene glycol succinate (DEGS; SUPELCO, USA), and tetrakis(hydroxyethyl)ethylene diamine (THEED; GL Sciences, Japan) were applied as layers to modulate interactions with gaseous molecules in the FET gate structure. PEG was dissolved in pure water at a concentration of 0.1 g L<sup>-1</sup>. Silicone OV-1, THEED, and DEGS were dissolved in tetrahydrofuran (THF; Fujifilm Wako Pure Chemical, Japan) at 0.1 g L<sup>-1</sup>. A 2- $\mu$ L portion of the solution was dropped onto the surface of the top insulating layer in the planar FET gate structure at room temperature. After dropping of the stationary phase material-dissolved solution, the FET sample was heated at 110 °C for 20 min in an oven to evaporate the solution. After evaporation of the solution, the stationary phase layer was formed. Then, a short (30 s) treatment by a radio-frequency (RF) sputtering process was applied to form a porous Pt gate electrode as the top layer of the PGFET structure. The conditions for RF sputtering included a power of 50 W in a vacuum chamber with a  $\sim$ 1 Pa Ar atmosphere.

### 1.2. Real-time volatile organic compound (VOC) sensing by stationary phase-modified PGFETs

For real-time VOC vapor sensing by the stationary phase material-modified PGFET, we used a dedicated electronic circuit. For real-time monitoring, the drain-source voltage ( $V_{DS}$ ) and gate voltage ( $V_G$ ) of the FET were fixed at 40 and 400 mV, respectively. The sampling frequency was set to be 10 Hz (i.e., a sampling period of 0.1 s). The chemical-sensitive FET samples were arrayed and housed in a gas-flow cell, as shown in Fig. S3. Aldehydic functional compounds such as nonanal, hexanal, and benzaldehyde were used as the VOC analytes. The VOC vapor was generated by a vapor-generating apparatus (Permeator PD-1B-2, GASTEC, Japan) and added to the gas-flow cell under the flow of dry N<sub>2</sub> carrier gas. The concentration of the vapor analyte (nonanal 0.4, 0.8, 2 ppm; hexanal 4, 7, 13 ppm; benzaldehyde 0.7, 1, 6 ppm) was conditioned by selecting the glass tube size, which contained the VOC, and the heating temperature. The sample flow rate of the VOC vapor under a dry N<sub>2</sub> carrier gas was fixed at 0.5 L min<sup>-1</sup>. After stabilization of the measurement equipment in all measurements, sensing measurements by the four PGFET sensors were started. The sample-flow interval was 10 s. The introduction of VOC analyte to the gas-flow cell was repeated five times in one measurement. All sensing measurements were conducted two times.

### 1.3. Electron microscope observations of the PGFET sample

A representative PGFET, sample s1, was observed by electron microscope imaging. Top view observations of the PGFET sensor and porous Pt gate electrode (Fig. S1 and 1b) were acquired on a scanning electron microscope (SEM; JSM-7800F, JEOL, Japan) operating at accelerating voltages of 5 and 10 kV. After SEM observations, the sample was processed by a focused ion beam (FIB) system (JIB-4501, JEOL, Japan) to obtain cross sections of the FET gate structure. To protect the configuration in the FIB cutting process, the sample was protected with resin. The cross-sectional gate structure (Fig. 1c and S2) was observed by transmission electron microscope (TEM; JEM-2100F, JEOL,

Japan) imaging operating at an accelerating voltage of 200 kV.

#### 1.4. Classification of signal patterns derived from PGFET sensors by machine-learning technique for recognition of VOCs

The measured peaks (measured 2 times) were used for a supervised learning approach. Individual five-peak patterns were extracted from the sensing results in the manner shown in Fig. S5. In the peak pattern, the VOC-flow starting point and the point of the next VOC flow were defined as start and end-point, respectively. The extracted peak pattern is expressed as the follow function 1:

$$g(n) \quad n = 1, 2, \dots, N, \quad (1)$$

where  $n$  is time-series data index.

To generate feature vectors applied for a machine learning technique, signal processing was conducted through a discrete Fourier transform (DFT) with the following formula:

$$G(k) = \sum_{n=0}^{N-1} g(n)w(n)\exp\left(-j\frac{2\pi kn}{N}\right) = A_{i,k} - jB_{i,k}, \quad (2)$$

where  $w(n)$  is a Hann window function; frequency index,  $k = 0, 1, 2, \dots, N-1$ ; channel index,  $i = 0, 1, 2, \dots, I$ ;  $j$  is an imaginary unit.  $A_{i,k}$  and  $B_{i,k}$  are the real and imaginary part of a complex number, respectively.

In the spectrum, similar to DFT, the feature vector  $x$  is expressed by  $A_{i,k}$  and  $B_{i,k}$  as:

$$x = [A_{1,k_{min}}, A_{1,k_{min+1}}, \dots, A_{1,k_{max}}, B_{1,k_{min}}, B_{1,k_{min+1}}, \dots, B_{1,k_{max}}, \\ A_{2,k_{min}}, A_{2,k_{min+1}}, \dots, A_{2,k_{max}}, B_{2,k_{min}}, B_{2,k_{min+1}}, \dots, B_{2,k_{max}}, \\ \dots, A_{I,k_{min}}, A_{I,k_{min+1}}, \dots, A_{I,k_{max}}, B_{I,k_{min}}, B_{I,k_{min+1}}, \dots, B_{I,k_{max}}] \quad (3)$$

where  $k_{max}$  (550) and  $k_{min}$  (0) are the upper and lower limit frequency, respectively. In this work, the dimensions of the feature vectors are  $2 \times (k_{max} - k_{min} + 1) \times I$ , where  $I = 4$  (the number of stationary phase-modified PGFET sensors).

The data set of feature vectors was used to classify the signal patterns by an algorithm of random forest in a machine learning software of Waikato Environment for Knowledge Analysis: Weka. Cross-validations were conducted between each peak pattern except for peak 1. Parameters were tuned to optimize the value of the F-measure as a measure of classification precision.

2. Supplemental figures

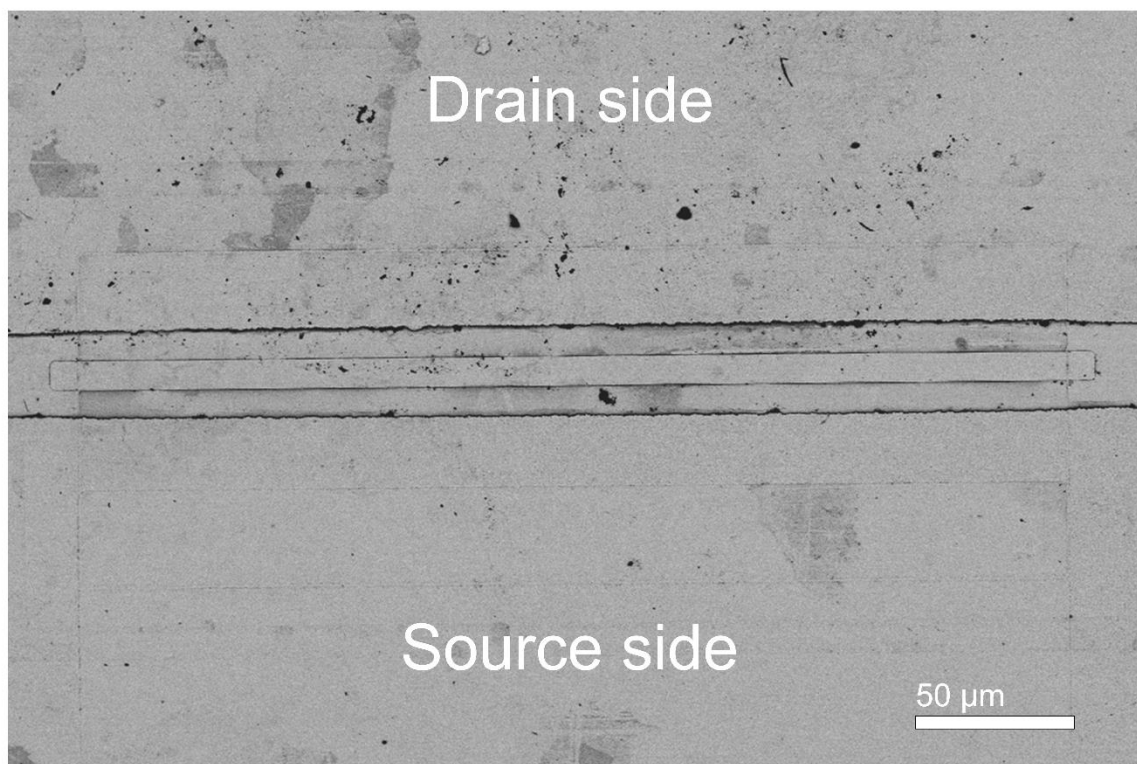

Fig. S1. Top view image of the PGFET of sensor 1. Scale bar is 50 μm.

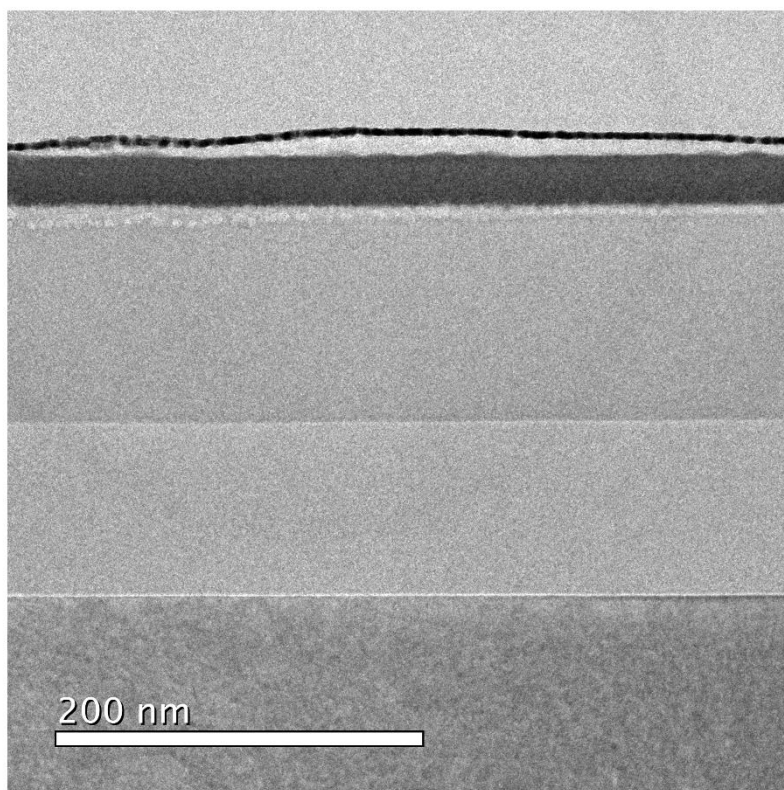

Fig. S2. Cross-sectional TEM image of the PGFET of sensor 1. Scale bar is 200 nm.

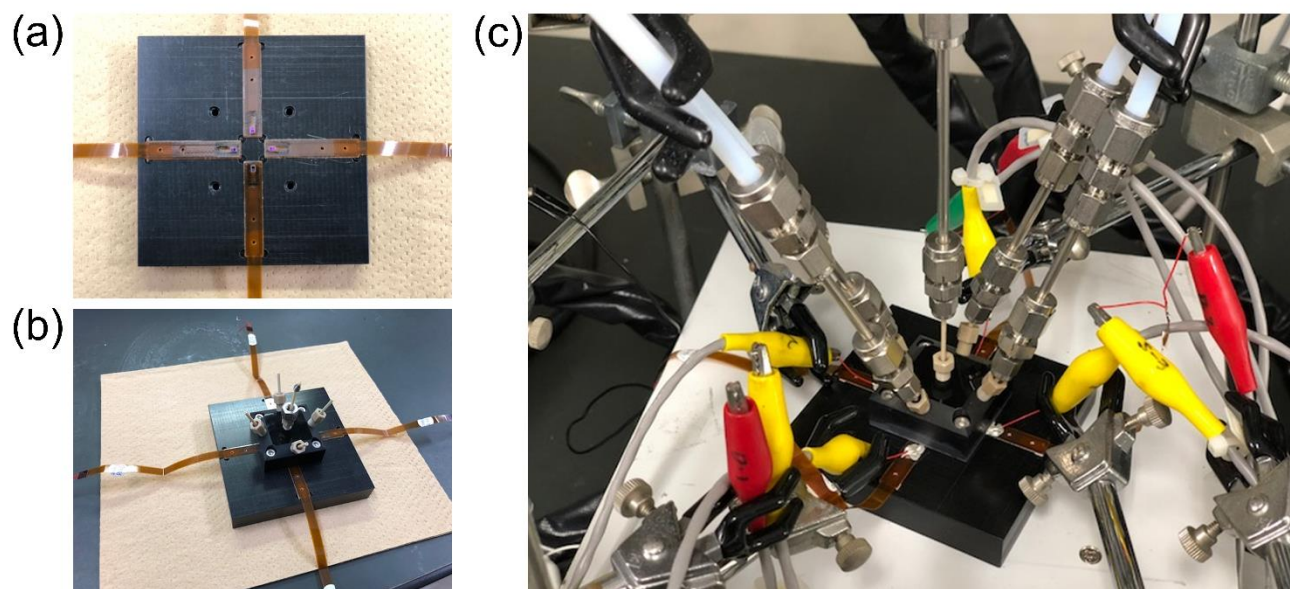

Fig. S3. Sensor array of developed stationary phase-modified PGFET sensors. (a) Arrayed PGFET sensors with no capping of the gas-flow cell, (b) with capping, and (c) appearance of real-time sensing measurement with the gas-flow cell containing the PGFET sensor array.

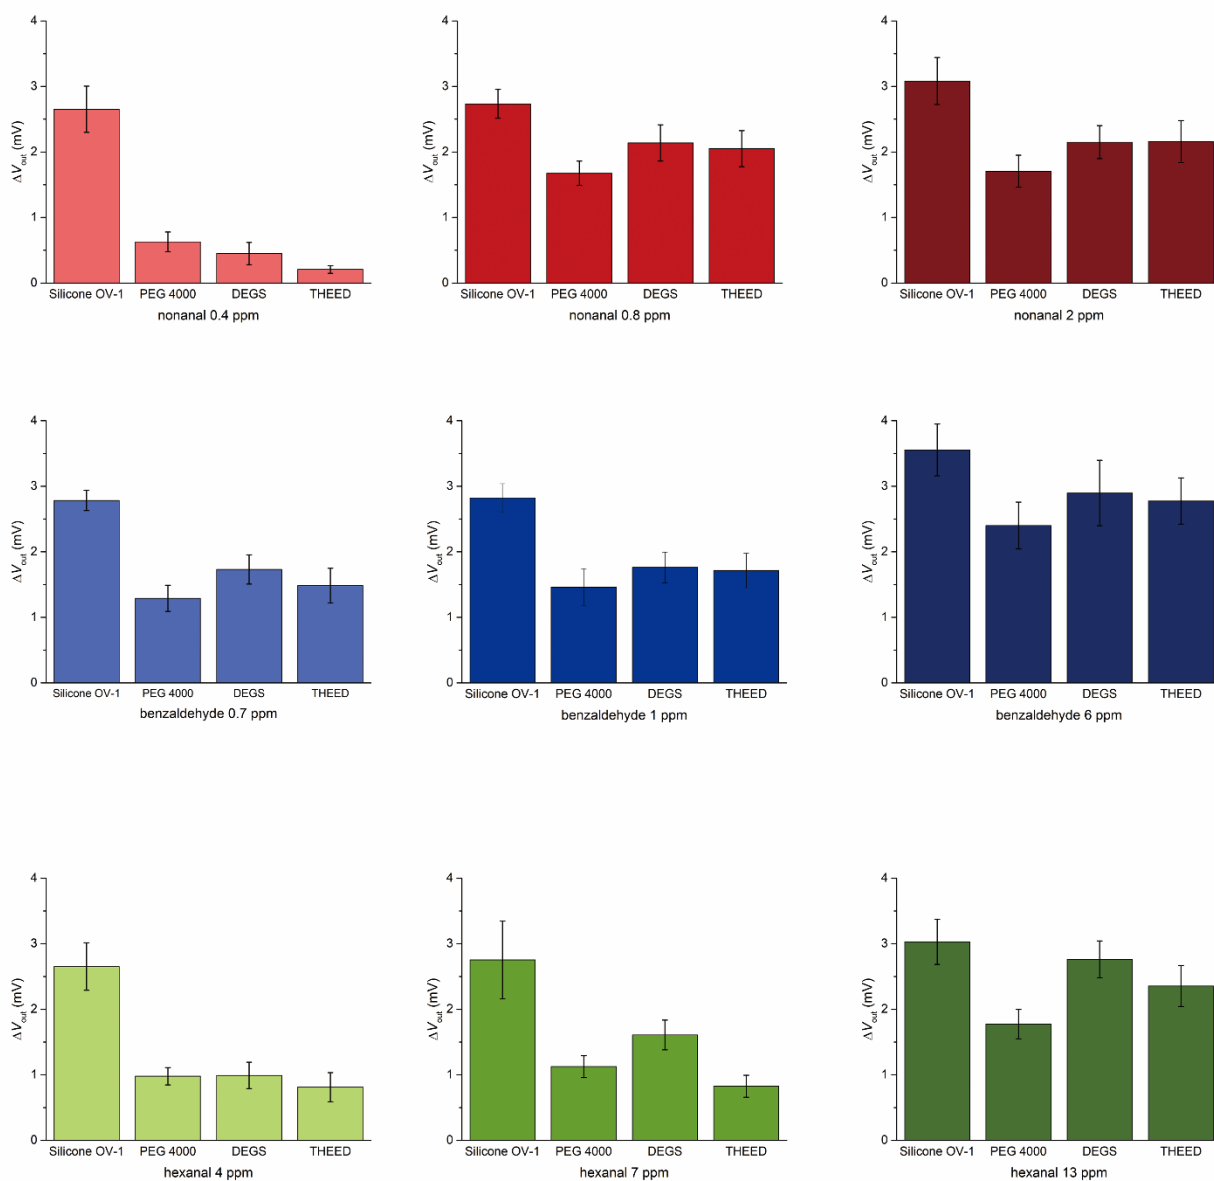

Fig. S4. Peak height differences from each stationary phase material-modified PGFETs at room temperature.

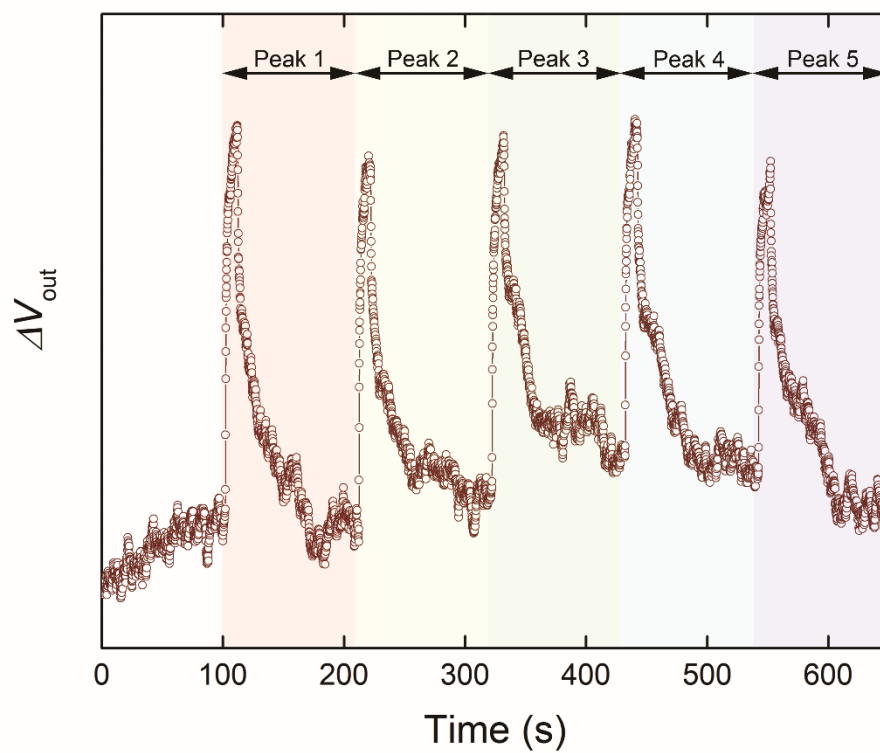

Fig. S5. Extraction of responsive peak patterns from a real-time measurement result.
